# Supplementary material for: Preparation and characterisation of hydrotalcite/carboxyadamantane intercalation compounds as fillers of polymeric nanocomposites
Source: Royal Society of Chemistry journal article supplement (doi:10.1039/b613842j), 2006-12-22
Supplement: b613842j.pdf [file b613842j.pdf]

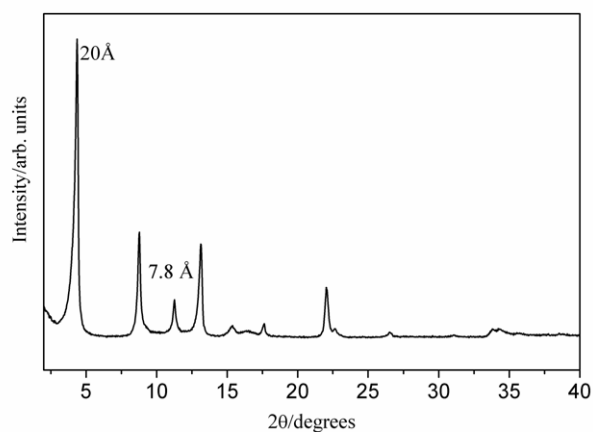

Fig. S1 XRPD pattern of the sample  $[\text{Zn}_{0.65}\text{Al}_{0.35}(\text{OH})_2](1\text{CA})_{0.315}(\text{Cl})_{0.035}\cdot 0.72 \text{H}_2\text{O}$ .

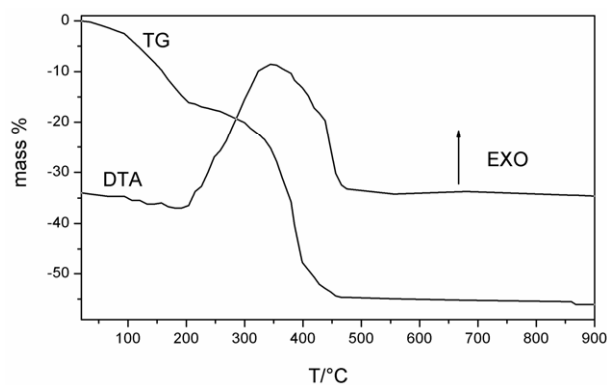

Fig. S2 TGA and DTA curves of ZnAl-1AA. Operative condition: air flow, heating rate 5°C/min.

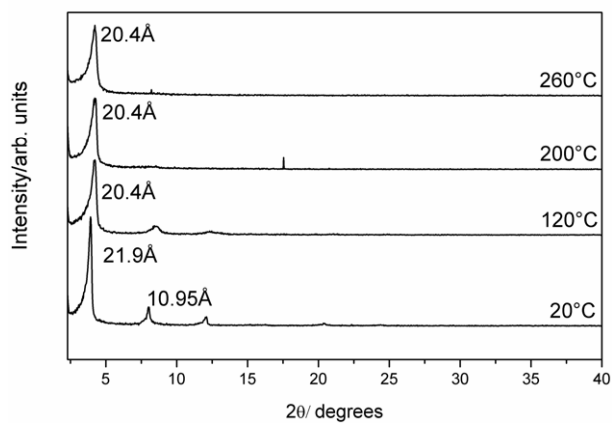

Fig. S3 XRPD patterns of the sample ZnAl-1AA recorded at the indicated temperatures.
